# Supplementary material
Source: PubMed Central journal article supplement (PMC2982859)

Fig. S1

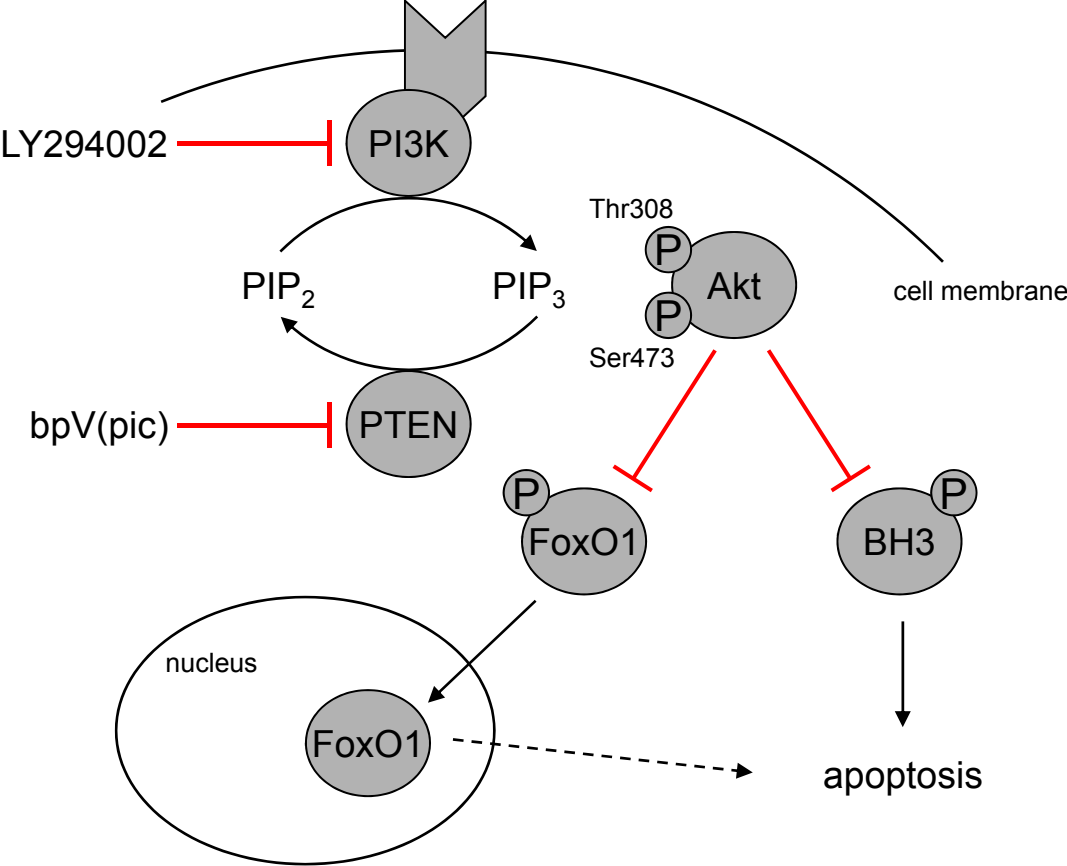

Supplement: NIHMS247180-supplement-01.pdf [file NIHMS247180-supplement-01.pdf]

**Fig. S2**

**mock - infected**

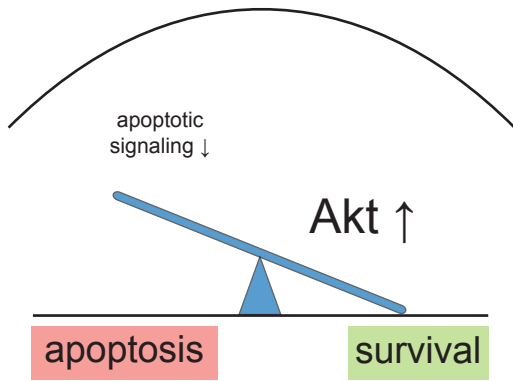

**infected**

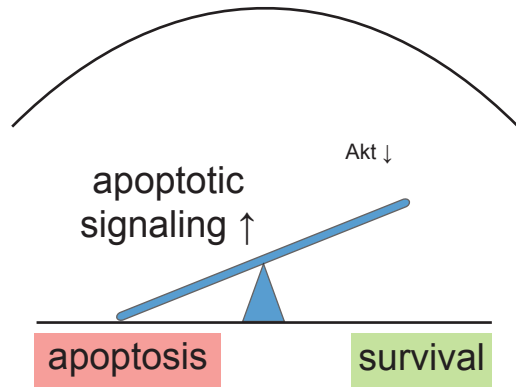

**infected + bpV(pic)**

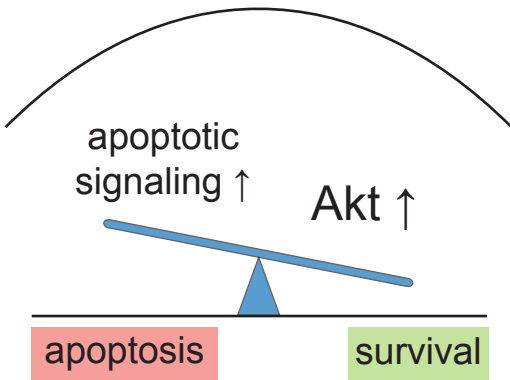

**infected + bpV(pic) + LY294002**

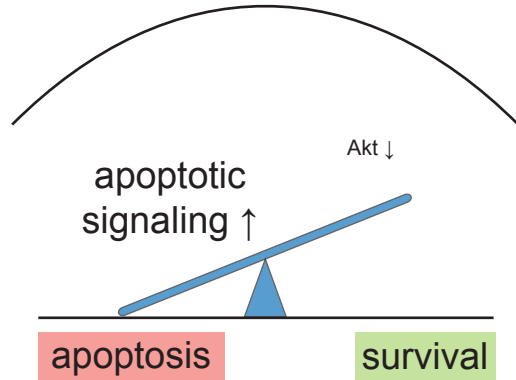

Supplement: NIHMS247180-supplement-02.pdf [file NIHMS247180-supplement-02.pdf]
